# Supplementary material for: Niacin ameliorates ulcerative colitis via prostaglandin D2‐mediated D prostanoid receptor 1 activation
Source: PubMed Central journal article supplement (PMC5412792; doi:10.15252/emmm.201606987), 2017-03-27
Supplement: EMMM-9-571-s002.pdf [file EMMM-9-571-s002.pdf]

## Expanded View Figures

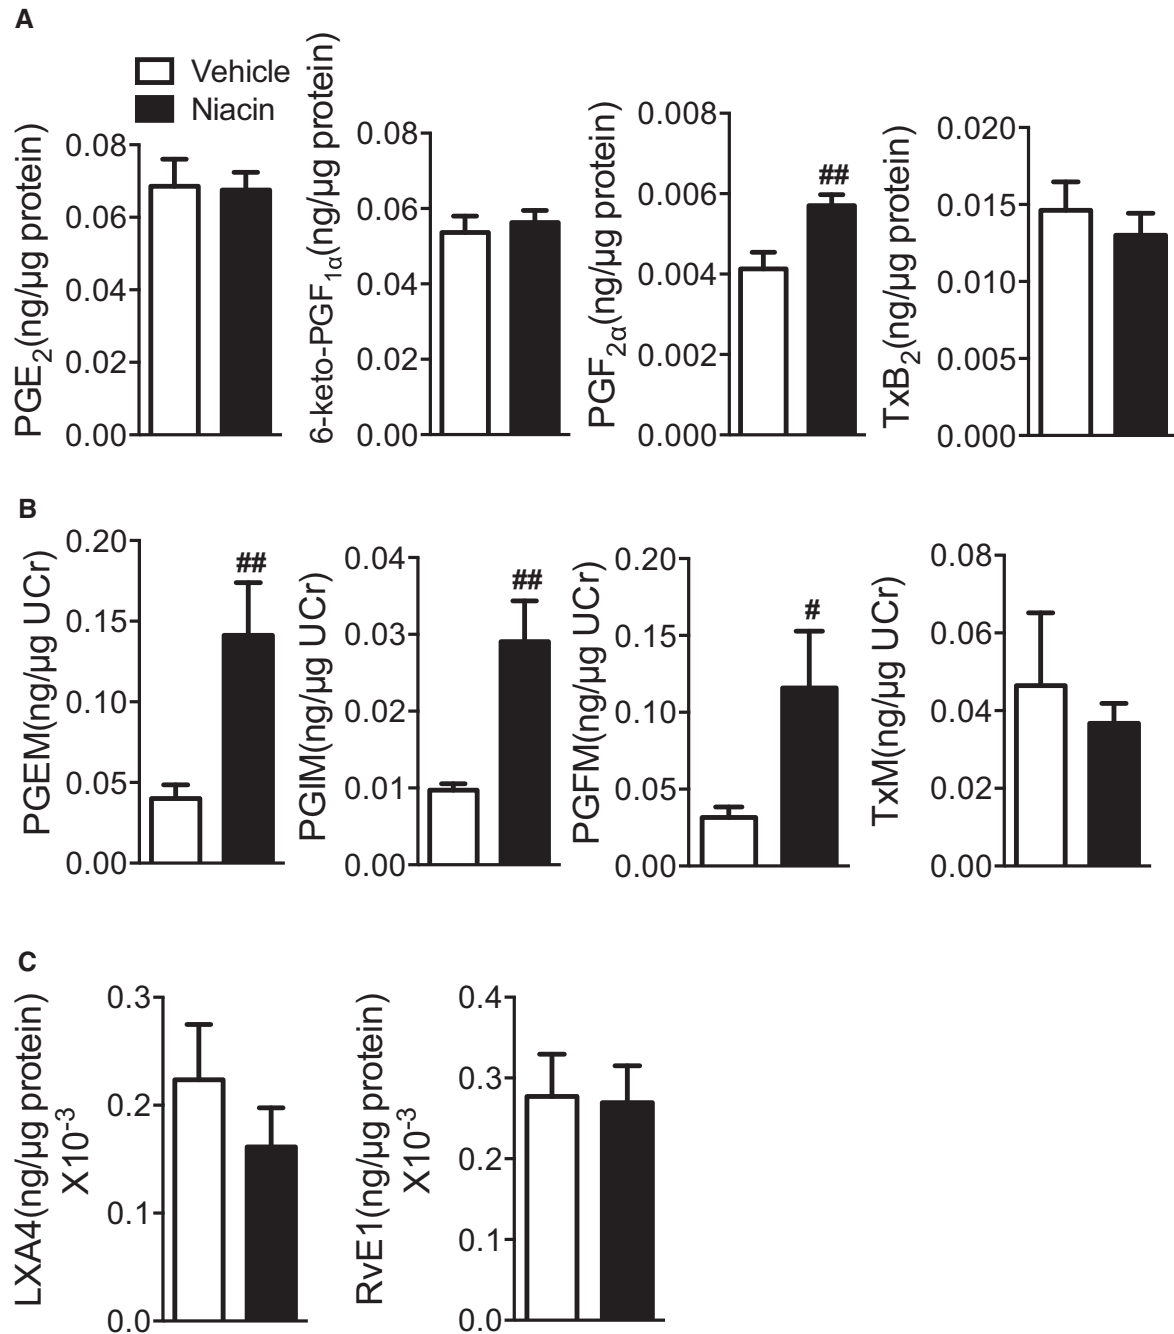

**Figure EV1. Effect of niacin on PG, RvE1, and LXA4 production in mice after DSS challenge.**

A Mass spectrometry analysis of PG production in colons from niacin (600 mg/kg)-treated mice after DSS challenge. Vehicle,  $n = 6$ ; niacin 600 mg/kg,  $n = 7$ .

B Measurement of urinary metabolite of PGs in niacin (600 mg/kg)-treated mice. PGEM, 11 $\alpha$ -hydroxy-9,15-dioxo-2,3,4,5-tetranor-prostane-1,20-dioic acid; PGIM, 2,3-dinor-6-keto-PGF<sub>1 $\alpha$</sub> ; TxM, 2,3-dinor-TxB<sub>2</sub>; PGFM, 13,14-dihydro-15-keto-PGF<sub>2 $\alpha$</sub> .  $n = 6$ .

C Mass spectrometry analysis of RvE1 and LXA4 production in colons from niacin (600 mg/kg)-treated mice after DSS challenge.  $n = 6$ .

Data information: Data are shown as mean  $\pm$  SEM. Data are representative of at least two independent experiments. Statistical significance was determined using unpaired Student's  $t$ -tests. (A) <sup>##</sup> $p < 0.01$ . (B) <sup>#</sup> $p < 0.05$ , <sup>##</sup> $p < 0.01$ .

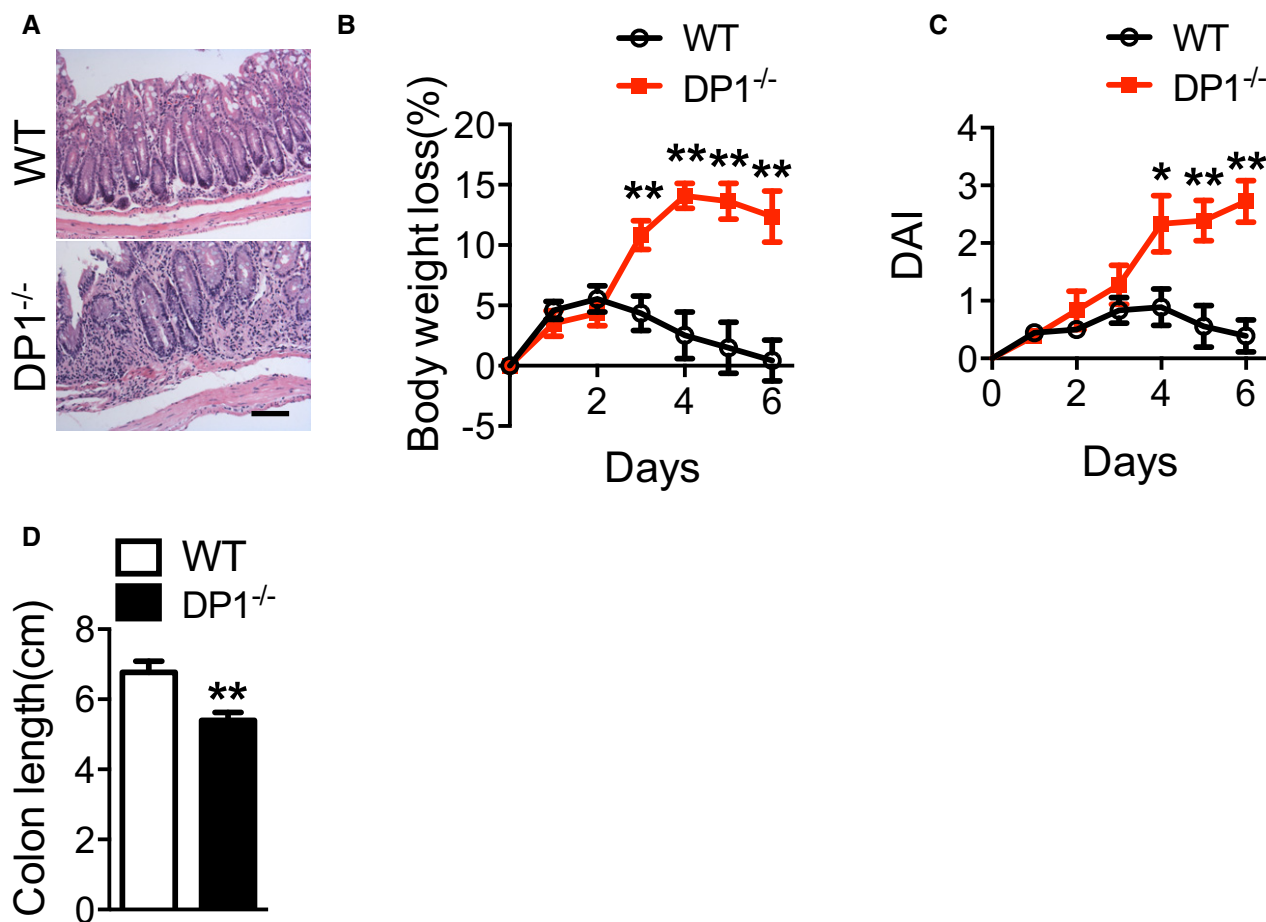

**Figure EV2. DP1 deficiency augments TNBS-induced colitis in mice.**

**A** H&E staining of histological sections in the distal colon from the mice after TNBS challenge. Scale bar: 100  $\mu$ m. Graphs represent overall histology score.

**B–D** Body weight loss (B), disease activity index (DAI, C), and colon length (D) of DP1<sup>-/-</sup> and WT mice in response to 2.5% TNBS challenge.

Data information: Data are shown as mean  $\pm$  SEM. Statistical significance was determined using unpaired Student's *t*-tests. \**P* < 0.05, \*\**P* < 0.01 compared with WT; *n* = 6.

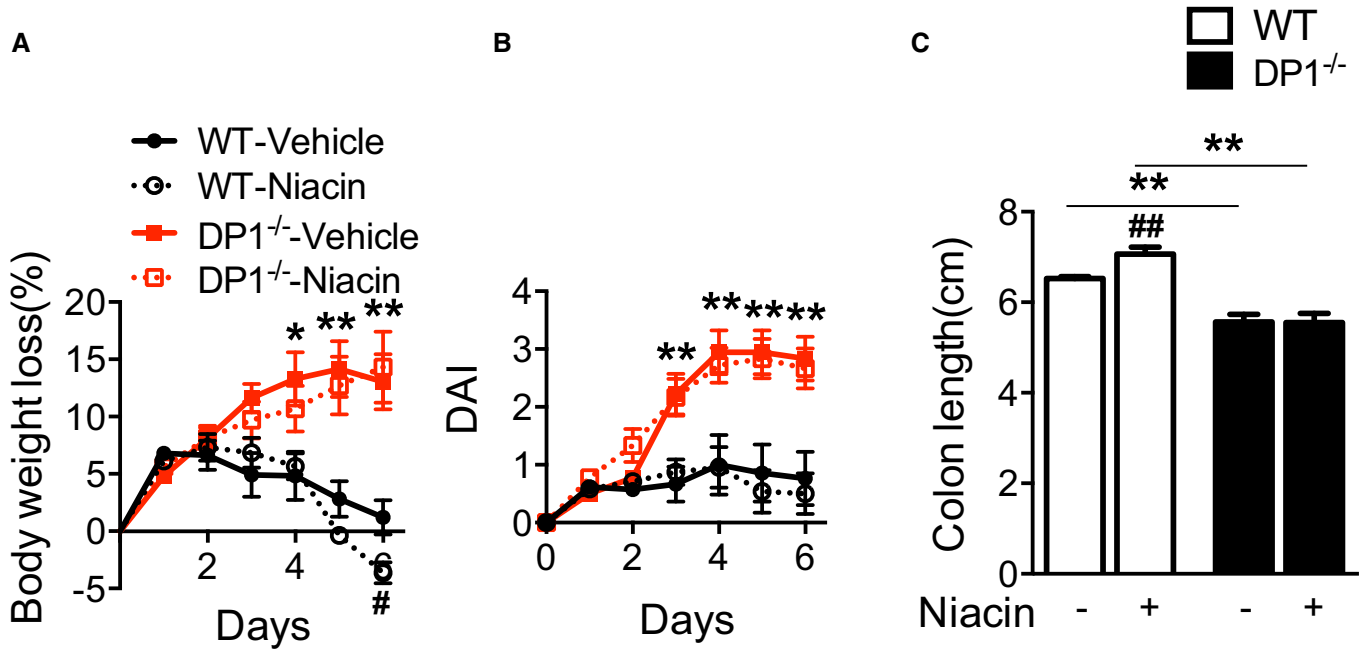

**Figure EV3. Niacin protects mice against from TNBS-induced colitis.**

A–C Effect of niacin treatment on body weight loss (A), disease activity index (DAI, B), and colon length (centimeter) (C) of DP1<sup>-/-</sup> and WT mice in response to 2.5% TNBS challenge.

Data information: Data are shown as mean ± SEM. Statistical significance was determined using two-way ANOVA followed by a Bonferroni *post hoc* test. #*P* < 0.05, ##*P* < 0.01 vs. vehicle. \**P* < 0.05, \*\**P* < 0.01 compared with WT. WT-vehicle, *n* = 7; WT-niacin, *n* = 8; DP1<sup>-/-</sup>-vehicle, DP1<sup>-/-</sup>-niacin, *n* = 6.

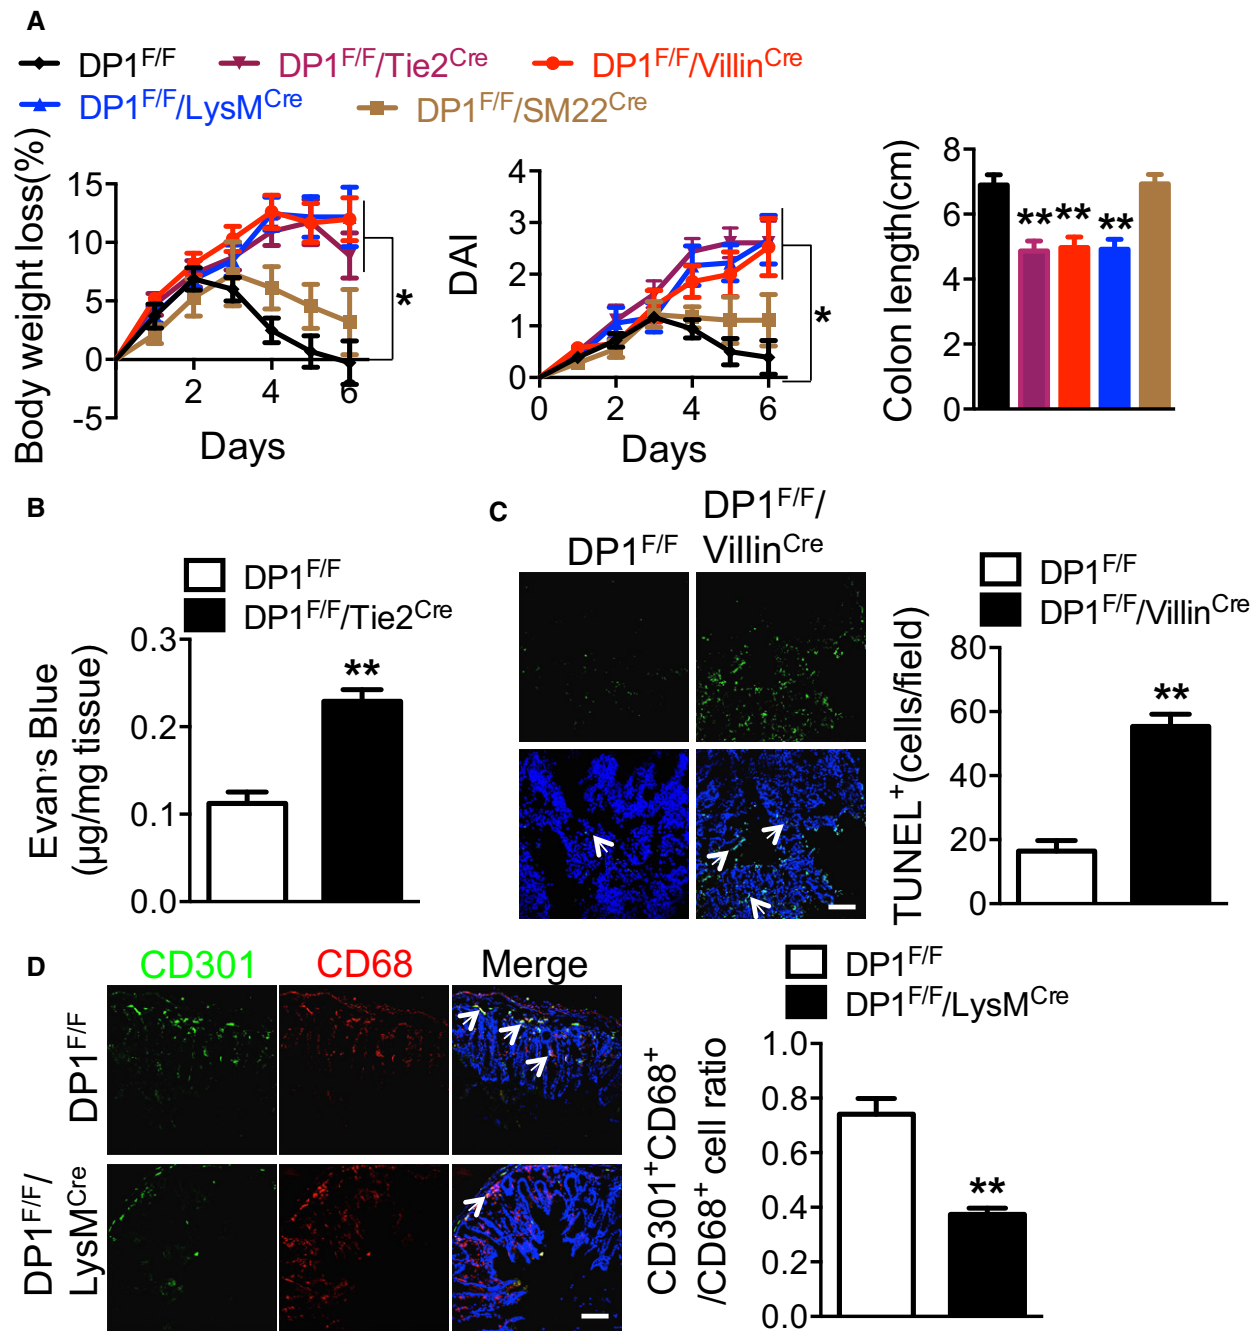

**Figure EV4. TNBS-induced colitis in cell-specific DP1-deficient mice.**

A Body weight loss, disease activity index (DAI), and colon length of DP1<sup>F/F</sup>/Tie2<sup>Cre</sup> mice, DP1<sup>F/F</sup>/Villin<sup>Cre</sup> mice, DP1<sup>F/F</sup>/LysM<sup>Cre</sup> mice, and DP1<sup>F/F</sup>/SM22<sup>Cre</sup> mice in response to TNBS treatment.

B Quantitative measurement of vascular permeability by dye leakage in the colonic mucosa from TNBS-challenged DP1<sup>F/F</sup>/Tie2<sup>Cre</sup> and DP1<sup>F/F</sup> mice. The mice were sacrificed at day 6.

C TUNEL assay (left) and quantitation (right) in colonic tissues from TNBS-challenged DP1<sup>F/F</sup>/Villin<sup>Cre</sup> and DP1<sup>F/F</sup> mice. The arrows indicate the TUNEL<sup>+</sup> cells (left). Scale bar: 100 µm. DP1<sup>F/F</sup>, n = 7; DP1<sup>F/F</sup>/Villin<sup>Cre</sup>, n = 8.

D Representative immunofluorescent staining (left) and quantitation (right) of CD301<sup>+</sup>CD68<sup>+</sup> cells in colonic tissues from TNBS-challenged DP1<sup>F/F</sup>/LysM<sup>Cre</sup> and DP1<sup>F/F</sup> mice. The arrows indicate the CD301<sup>+</sup>CD68<sup>+</sup> cells (left). Scale bar: 100 µm. DP1<sup>F/F</sup>, n = 8; DP1<sup>F/F</sup>/LysM<sup>Cre</sup>, n = 6.

Data information: Data are shown as mean ± SEM. Statistical significance was determined using two-way ANOVA followed by a Bonferroni *post hoc* test (A) and unpaired Student's *t*-tests (B–D). (A, B) \**P* < 0.05, \*\**P* < 0.01 compared with DP1<sup>F/F</sup>. DP1<sup>F/F</sup>, DP1<sup>F/F</sup>/Tie2<sup>Cre</sup>, DP1<sup>F/F</sup>/LysM<sup>Cre</sup>, DP1<sup>F/F</sup>/SM22<sup>Cre</sup> n = 6; DP1<sup>F/F</sup>/Villin<sup>Cre</sup>, n = 7. (C, D) \*\**P* < 0.01 vs. DP1<sup>F/F</sup>.

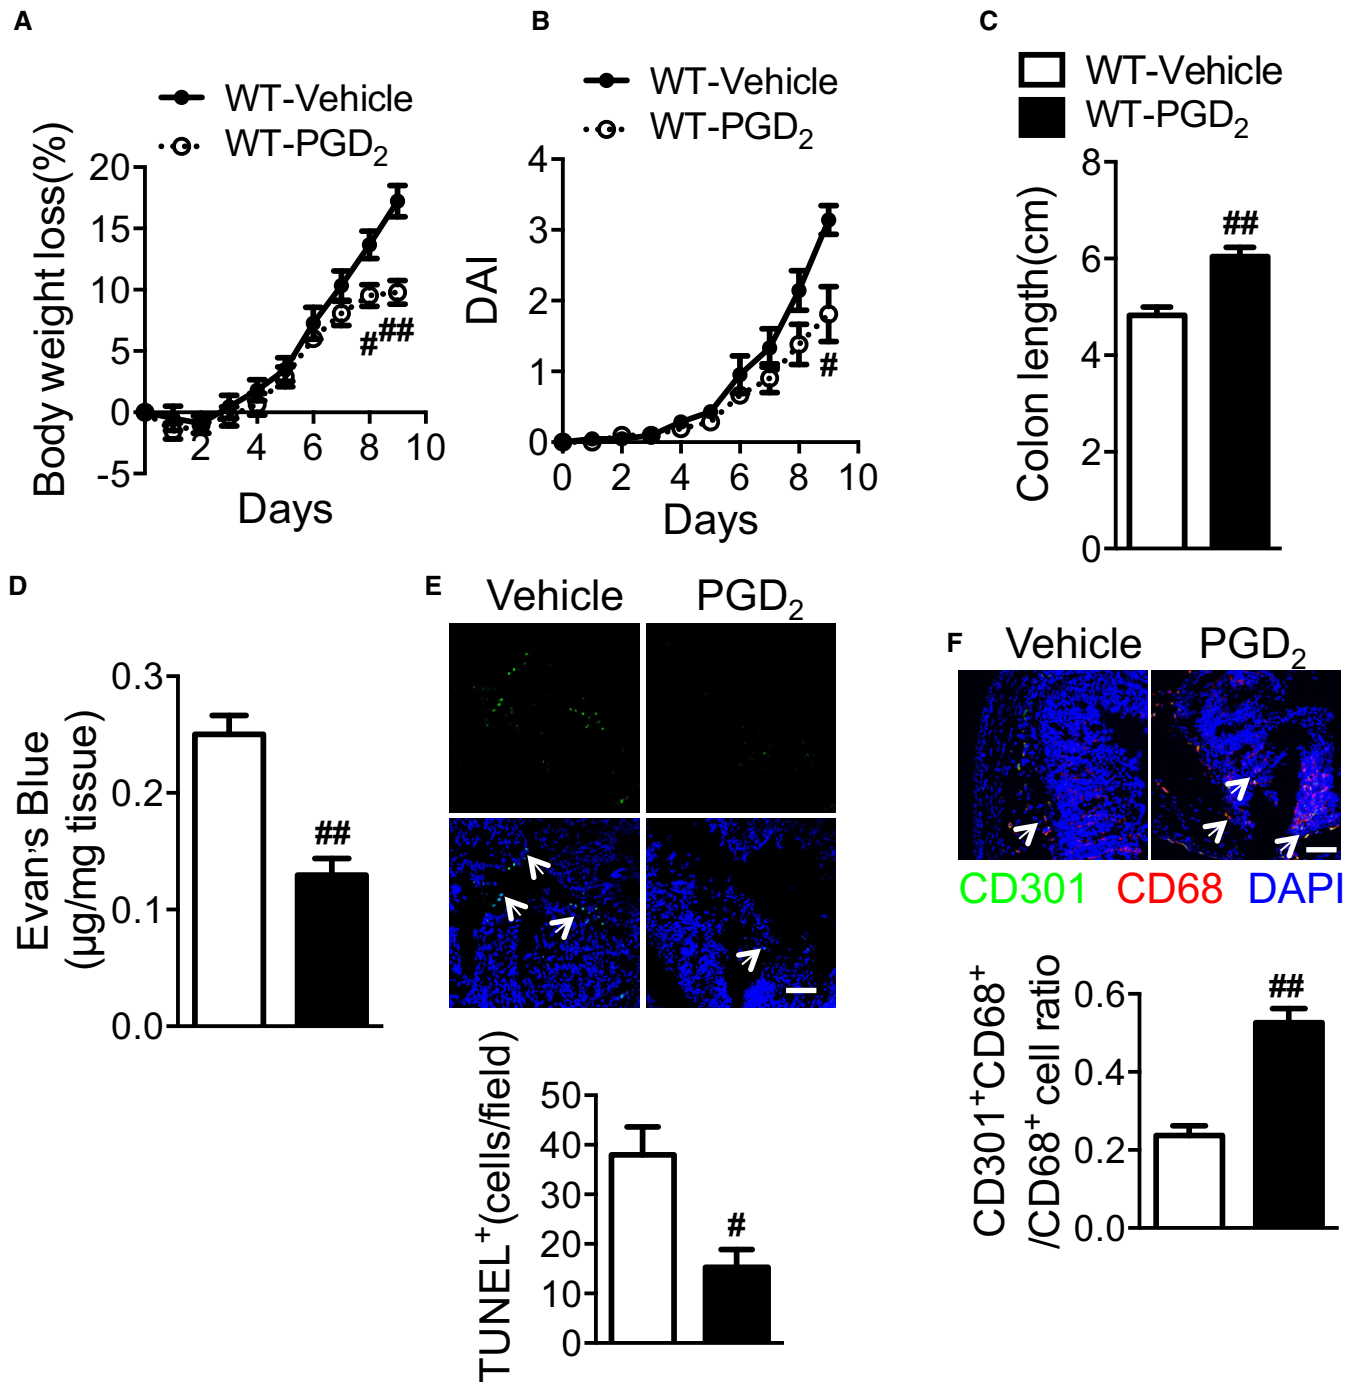

**Figure EV5. PGD<sub>2</sub> infusion ameliorates DSS-induced colitis in mice.**

A–C Effect of PGD<sub>2</sub> treatment on body weight loss (A), disease activity index (B), and colon length (C, centimeter) of WT mice in response to DSS challenge.

D Effect of PGD<sub>2</sub> on Evan's blue extravasation in the colonic mucosa from WT mice.

E Effect of PGD<sub>2</sub> on DSS-induced epithelial cell apoptosis in WT mice. Scale bars: 100 µm. The arrows indicate TUNEL<sup>+</sup> cells.

F Effect of PGD<sub>2</sub> on colonic macrophage infiltration in DSS-challenged WT mice. Scale bars: 100 µm. The arrows indicate CD301<sup>+</sup>CD68<sup>+</sup> cells.

Data information: All mice were sacrificed at day 9. Data are shown as mean ± SEM. Statistical significance was determined using unpaired Student's t-tests.

(A–C) <sup>#</sup>*P* < 0.05, <sup>##</sup>*P* < 0.01 vs. vehicle; *n* = 7. (D) <sup>##</sup>*P* < 0.01 compared with vehicle; *n* = 7. (E) <sup>#</sup>*P* < 0.05 compared with vehicle; vehicle, *n* = 5; PGD<sub>2</sub>, *n* = 7. (F) <sup>##</sup>*P* < 0.01 compared with vehicle; *n* = 5.
